# Supplementary material for: Hydrogen bonding in radical solution copolymerization kinetics of acrylates and methacrylates: a comparison of hydroxy- and methoxy-functionality
Source: Royal Society of Chemistry journal article supplement (doi:10.1039/c7py00185a), 2017-01-01
Supplement: c7py00185a1.pdf [file c7py00185a1.pdf]

## Hydrogen bonding in radical solution copolymerization kinetics of acrylates and methacrylates: A comparison of hydroxy- and methoxy- functionality

Jan E. S. Schier, David Cohen-Sacal, Robin A. Hutchinson\*

Department of Chemical Engineering, Dupuis Hall, Queen's University, Kingston, ON K7L 3N6, Canada

### Supporting information

#### NMR Analysis of MEA containing samples

Copolymers containing MEA were analyzed via  $^1\text{H}$  NMR by taking the ratio of the signals arising from the distinct monomer ester side chains. Fig. S1 shows the spectrum of polyMEA, and a copolymer of BA and MEA (poly(BA-co-MEA)). The  $\text{CH}_2$  group adjacent to the ester group creates a signal at 4.20 ppm in polyMEA, whereas the same group in polyBA produces a peak at 4.05 ppm. The deshielding effect introduced by the methoxy group in MEA creates a resonance of the adjacent  $\text{CH}_2$  and  $\text{CH}_3$  groups at 3.57 ppm and 3.36 ppm, respectively. In contrast, the butyl chain in polyBA produces multiplets at lower chemical shifts, notably the triplet at 0.95 ppm arising from the terminal  $\text{CH}_3$  group. Integrating these resolved peaks allows for calculation of relative monomer composition following equation 1:

$$F_{MEA} = \frac{\int \text{CH}_2(3.57 \text{ ppm})}{\int \text{CH}_2(4.20 \text{ ppm}) + \int \text{CH}_2(4.05 \text{ ppm})} \quad (\text{eq. 1})$$

The results were verified with the triplet at 0.95 ppm to determine the BA (or BMA) content using equation 2:

$$F_{BA/BMA} = \frac{\frac{2}{3} \int \text{CH}_3(0.95 \text{ ppm})}{\int \text{CH}_2(4.20 \text{ ppm}) + \int \text{CH}_2(4.05 \text{ ppm})} \quad (\text{eq. 2})$$

The calculations were in good agreement, and the reported composition is the average of the two values.

The sharp peak at 3.94 ppm stems from monomethyl ether hydroquinone inhibitor, while the peak at 3.23 ppm is attributed to DMPA photoinitiator residue. The region spanning from 1.4-2.5 ppm contains the resonance from protons in the polymer backbone. Monomers configured with *meso* tacticity give rise to the peaks centred at 1.95 ppm and 1.52 ppm, whereas those in a *racemo* arrangement produce the peak at 1.69 ppm.<sup>1</sup> Note that no residual monomer peaks are found after isolation.

---

<sup>1</sup> J. F. J. Coelho, J. Gois, A. C. Fonseca, R. A. Carvalho, A. V. Popov, V. Percec, M. H. Gil, *J. Polym. Sci. Part A-Polym. Chem.*, 2009, 47, 4454-4463.

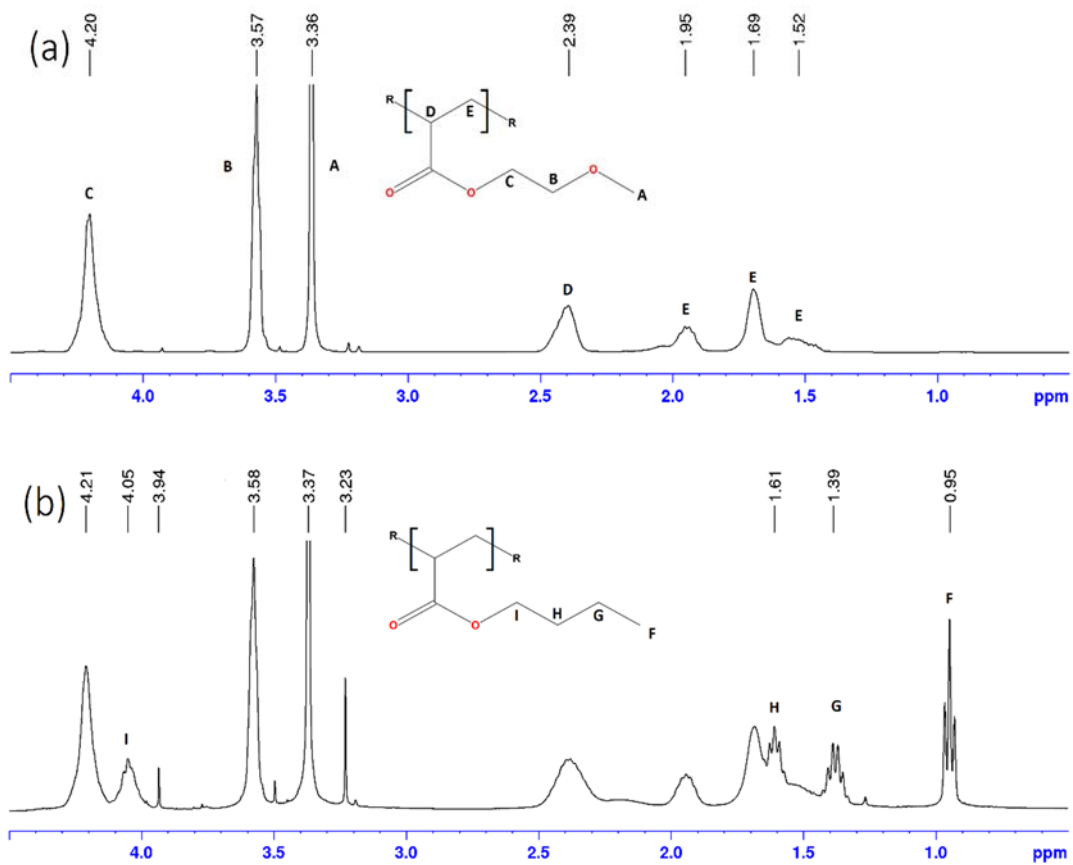

**Fig. S1.**  $^1\text{H}$  NMR peaks assigned to protons (a) of polyMEA in  $\text{CDCl}_3$  and (b) poly(BA-co-MEA) in  $\text{CDCl}_3$ . Low-conversion polymers produced at  $50^\circ\text{C}$  from bulk MEA for (a) and a mixture of 30 vol% BA (balance MEA) for (b).

## Tabulated NMR data for copolymer composition analysis

All polymer samples for NMR were synthesized at 50 °C, as previous studies demonstrated a negligible effect of temperature on relative monomer reactivity (within experimental error).

**Table S1:** Copolymer composition for BA/HEA samples produced by PLP in bulk, xylenes, MIBK, BuOH and DMF

| Bulk             |                  | Xylenes          |                  | MIBK             |                  | BuOH             |                  | DMF              |                  |
|------------------|------------------|------------------|------------------|------------------|------------------|------------------|------------------|------------------|------------------|
| $f_{\text{HEA}}$ |
| 0.13             | 0.27             | 0.13             | 0.16             | 0.13             | 0.17             | 0.13             | 0.14             | 0.13             | 0.11             |
| 0.25             | 0.44             | 0.25             | 0.34             | 0.25             | 0.281            | -                | -                | 0.25             | 0.22             |
| 0.36             | 0.52             | 0.36             | 0.50             | 0.36             | 0.484            | 0.36             | 0.40             | 0.36             | 0.35             |
| 0.47             | 0.65             | -                | -                | -                | -                | -                | -                | 0.47             | 0.47             |
| 0.57             | 0.69             | 0.57             | 0.75             | 0.57             | 0.681            | 0.57             | 0.62             | 0.57             | 0.58             |
| 0.66             | 0.82             | 0.66             | 0.82             | 0.66             | 0.77             | -                | -                | 0.66             | 0.65             |
| -                | -                | 0.75             | 0.86             | -                | -                | 0.75             | 0.79             | 0.75             | 0.73             |
| 0.84             | 0.91             | -                | -                | 0.84             | 0.883            | -                | -                | -                | -                |
| 0.92             | 0.96             | 0.92             | 0.95             | 0.92             | 0.9517           | 0.92             | 0.95             | -                | -                |

**Table S2:** Copolymer composition for BA/MEA samples produced by PLP in bulk, BuOH and DMF

| Bulk             |                  | BuOH             |                  | DMF              |                  |
|------------------|------------------|------------------|------------------|------------------|------------------|
| $f_{\text{MEA}}$ | $F_{\text{MEA}}$ | $f_{\text{MEA}}$ | $F_{\text{MEA}}$ | $f_{\text{MEA}}$ | $F_{\text{MEA}}$ |
| 0.11             | 0.09             | 0.11             | 0.10             | 0.11             | 0.11             |
| 0.32             | 0.31             | 0.32             | 0.32             | 0.32             | 0.30             |
| 0.52             | 0.53             | 0.52             | 0.53             | 0.52             | 0.51             |
| 0.72             | 0.74             | 0.72             | 0.73             | 0.72             | 0.70             |
| 0.91             | 0.91             | 0.91             | 0.92             | 0.91             | 0.92             |

**Table S3:** Copolymer composition for BMA/MEA samples produced by PLP in bulk, xylenes, MIBK, BuOH and DMF

| Bulk             |                  | BuOH             |                  | DMF              |                  |
|------------------|------------------|------------------|------------------|------------------|------------------|
| $f_{\text{MEA}}$ | $F_{\text{MEA}}$ | $f_{\text{MEA}}$ | $F_{\text{MEA}}$ | $f_{\text{MEA}}$ | $F_{\text{MEA}}$ |
| 0.12             | 0.09             | 0.12             | 0.06             | 0.12             | 0.05             |
| 0.35             | 0.21             | 0.35             | 0.19             | 0.35             | 0.18             |
| 0.55             | 0.35             | 0.55             | 0.35             | 0.55             | 0.33             |
| 0.74             | 0.55             | 0.74             | 0.53             | 0.74             | 0.52             |
| 0.92             | 0.81             | 0.92             | 0.82             | 0.92             | 0.79             |

## Tabulated PLP data for $k_p^{\text{cop}}$ and supplementary graphs

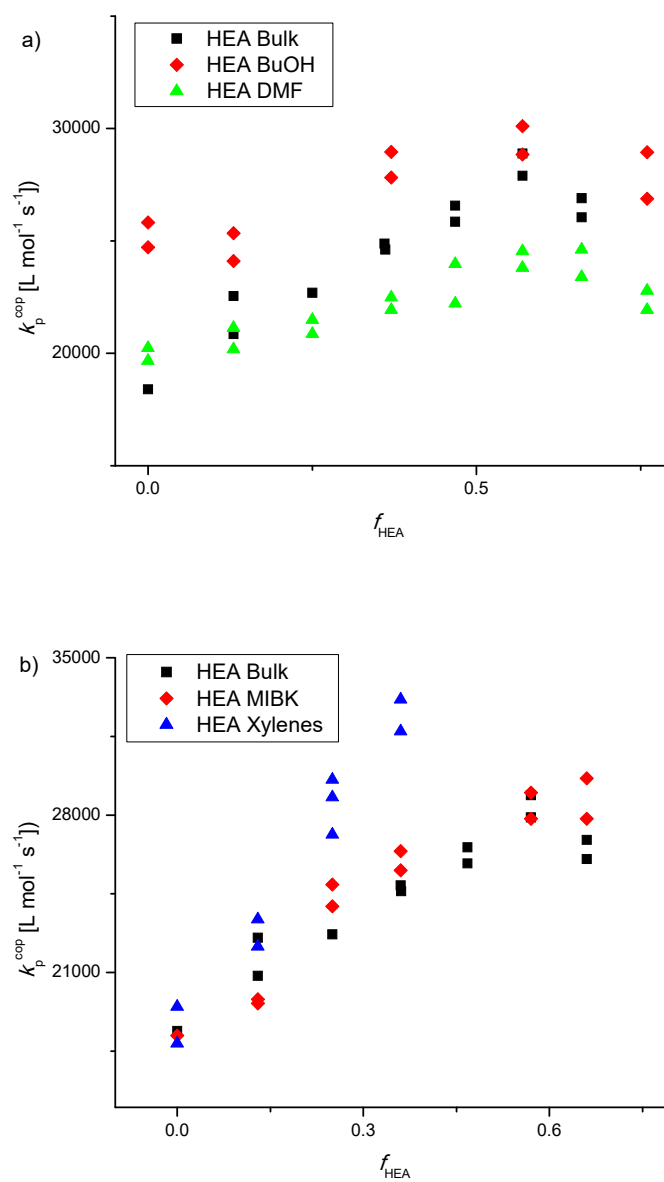

**Fig. S2:** a) Evolution of  $k_p^{\text{cop}}$  for BA/HEA as a function of HEA monomer mole fraction at 30 °C in (a) bulk (black), BuOH (red) and DMF (green), and (b) in bulk (black), MIBK (red) and xylenes (blue).

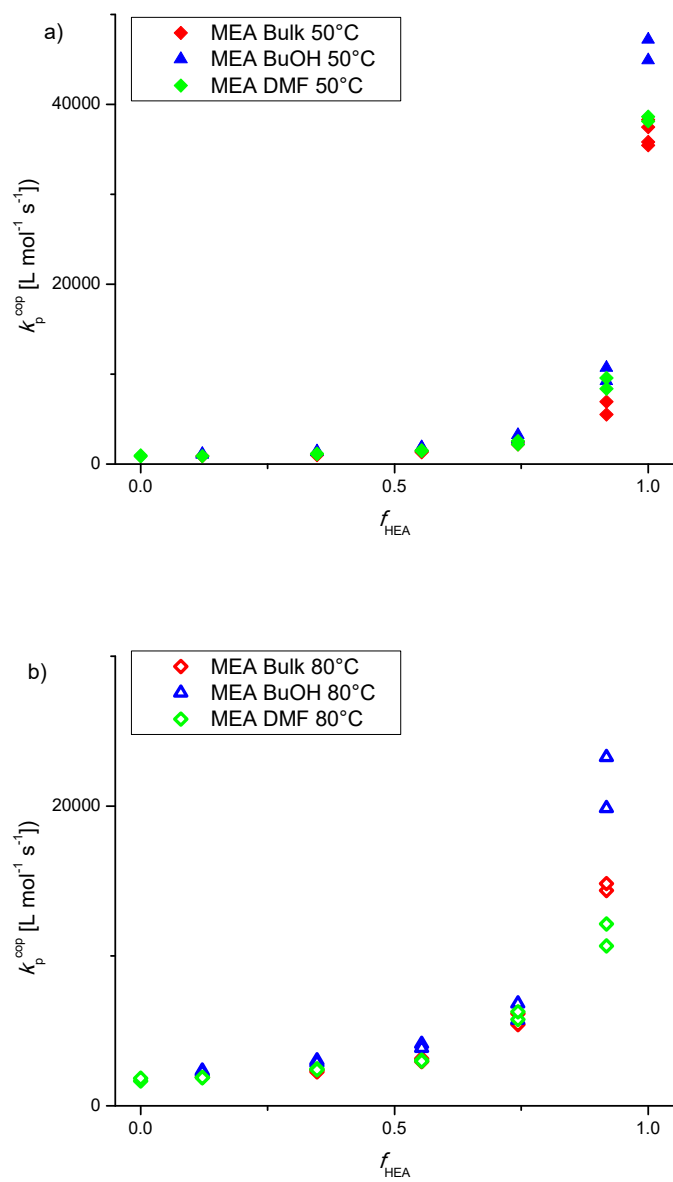

**Fig. S3:** a) Evolution of  $k_p^{\text{cop}}$  for BMA/MEA as a function of MEA monomer mole fraction at 50 °C in (a) bulk (red), BuOH (blue) and DMF (green), and (b) at 80 °C in the respective solvents.

**Table S4:**  $k_p^{\text{cop}}$  values for BA/HEA PLP copolymerizations in bulk

| $f_{\text{HEA}}$ | $\nu$ (Hz) | T (°C) | $k_p^{\text{DR}}$ (L·mol <sup>-1</sup> ·s <sup>-1</sup> ) | L1/L2 | $k_p^{\text{LS}}$ (L·mol <sup>-1</sup> ·s <sup>-1</sup> ) |
|------------------|------------|--------|-----------------------------------------------------------|-------|-----------------------------------------------------------|
| 0                | 400        | 30     | 18400                                                     | 0.514 | 19005                                                     |
| 0.13             | 400        | 30     | 20847                                                     | 0.571 | 21417                                                     |
| 0.13             | 500        | 30     | 22549                                                     | 0.524 | 25063                                                     |
| 0.25             | 500        | 30     | 22694                                                     | 0.529 | 22240                                                     |
| 0.36             | 400        | 30     | 24871                                                     | 0.495 | 26767                                                     |
| 0.36             | 500        | 30     | 24617                                                     | 0.567 | 27110                                                     |
| 0.47             | 400        | 30     | 25854                                                     | 0.555 | 26237                                                     |
| 0.47             | 500        | 30     | 26568                                                     | 0.492 | 28219                                                     |
| 0.57             | 400        | 30     | 27895                                                     | 0.559 | 27789                                                     |
| 0.57             | 500        | 30     | 28884                                                     | 0.527 | 28910                                                     |
| 0.66             | 400        | 30     | 26050                                                     | 0.503 | 29501                                                     |
| 0.66             | 500        | 30     | 26903                                                     | 0.559 | 27374                                                     |
| 0                | 450        | 50     | 26246                                                     | 0.522 | 25666                                                     |
| 0                | 500        | 50     | 27620                                                     | 0.553 | 28304                                                     |
| 0.13             | 450        | 50     | 30836                                                     | 0.515 | 32934                                                     |
| 0.13             | 500        | 50     | 31943                                                     | 0.497 | 34510                                                     |
| 0.25             | 450        | 50     | 34699                                                     | 0.511 | 36775                                                     |
| 0.25             | 500        | 50     | 34215                                                     | 0.512 | 35183                                                     |
| 0.36             | 400        | 50     | 38229                                                     | 0.544 | 41540                                                     |
| 0.36             | 500        | 50     | 40221                                                     | 0.517 | 40854                                                     |
| 0.47             | 450        | 50     | 41346                                                     | 0.495 | 41278                                                     |
| 0.47             | 500        | 50     | 42446                                                     | 0.550 | 46380                                                     |
| 0.60             | 450        | 50     | 41971                                                     | 0.530 | 44917                                                     |
| 0.60             | 500        | 50     | 44090                                                     | 0.499 | 43223                                                     |

**Table S5:**  $k_p^{\text{cop}}$  values for BA/HEA PLP copolymerizations in 50 v% BuOH

| $\hat{f}_{\text{HEA}}$ | $\nu$ (Hz) | T (°C) | $k_p^{\text{DR}}$ (L·mol <sup>-1</sup> ·s <sup>-1</sup> ) | L1/L2 | $k_p^{\text{LS}}$ (L·mol <sup>-1</sup> ·s <sup>-1</sup> ) |
|------------------------|------------|--------|-----------------------------------------------------------|-------|-----------------------------------------------------------|
| 0                      | 300        | 30     | 25813                                                     | 0.501 | 25715                                                     |
| 0                      | 400        | 30     | 24717                                                     | 0.513 | 24189                                                     |
| 0.13                   | 300        | 30     | 24106                                                     | 0.515 | 25521                                                     |
| 0.13                   | 400        | 30     | 25338                                                     | 0.499 | 26179                                                     |
| 0.36                   | 300        | 30     | 27820                                                     | 0.533 | 29698                                                     |
| 0.36                   | 400        | 30     | 28956                                                     | 0.537 | 30515                                                     |
| 0.57                   | 300        | 30     | 28845                                                     | 0.558 | 28388                                                     |
| 0.57                   | 400        | 30     | 30104                                                     | 0.541 | 32744                                                     |
| 0.76                   | 300        | 30     | 26873                                                     | 0.510 | 27268                                                     |
| 0.76                   | 400        | 30     | 28938                                                     | 0.544 | 29821                                                     |
| 0                      | 420        | 50     | 33142                                                     | 0.515 | 35506                                                     |
| 0                      | 500        | 50     | 35714                                                     | 0.548 | 34909                                                     |
| 0.13                   | 420        | 50     | 33379                                                     | 0.554 | 32868                                                     |
| 0.13                   | 500        | 50     | 36004                                                     | 0.516 | 37282                                                     |
| 0.37                   | 420        | 50     | 37912                                                     | 0.507 | 40157                                                     |
| 0.37                   | 500        | 50     | 40407                                                     | 0.561 | 40180                                                     |
| 0.58                   | 420        | 50     | 41416                                                     | 0.506 | 41954                                                     |
| 0.58                   | 500        | 50     | 44410                                                     | 0.571 | 47102                                                     |

**Table S6:**  $k_p^{\text{cop}}$  values for BA/HEA PLP copolymerizations in 50 v% DMF

| $f_{\text{HEA}}$ | $\nu$ (Hz) | T (°C) | $k_p^{\text{DR}}$ (L·mol <sup>-1</sup> ·s <sup>-1</sup> ) | L1/L2 | $k_p^{\text{LS}}$ (L·mol <sup>-1</sup> ·s <sup>-1</sup> ) |
|------------------|------------|--------|-----------------------------------------------------------|-------|-----------------------------------------------------------|
| 0                | 300        | 30     | 19672                                                     | 0.567 | 19171                                                     |
| 0                | 400        | 30     | 20241                                                     | 0.535 | 21773                                                     |
| 0.13             | 300        | 30     | 20179                                                     | 0.554 | 20054                                                     |
| 0.13             | 400        | 30     | 21139                                                     | 0.528 | 22855                                                     |
| 0.25             | 300        | 30     | 20860                                                     | 0.518 | 22638                                                     |
| 0.25             | 400        | 30     | 21484                                                     | 0.501 | 22277                                                     |
| 0.36             | 300        | 30     | 21926                                                     | 0.559 | 23094                                                     |
| 0.36             | 400        | 30     | 22484                                                     | 0.575 | 23282                                                     |
| 0.47             | 380        | 30     | 22217                                                     | 0.521 | 22957                                                     |
| 0.47             | 480        | 30     | 23977                                                     | 0.564 | 24319                                                     |
| 0.57             | 380        | 30     | 23812                                                     | 0.545 | 24060                                                     |
| 0.57             | 480        | 30     | 24549                                                     | 0.570 | 23832                                                     |
| 0.66             | 380        | 30     | 23395                                                     | 0.551 | 25197                                                     |
| 0.66             | 480        | 30     | 24617                                                     | 0.570 | 24506                                                     |
| 0.76             | 380        | 30     | 21933                                                     | 0.509 | 23112                                                     |
| 0.76             | 480        | 30     | 22782                                                     | 0.500 | 22725                                                     |
| 0                | 380        | 50     | 29221                                                     | 0.503 | 30620                                                     |
| 0                | 500        | 50     | 31204                                                     | 0.530 | 31870                                                     |
| 0.13             | 380        | 50     | 29797                                                     | 0.499 | 29407                                                     |
| 0.13             | 500        | 50     | 32439                                                     | 0.530 | 33298                                                     |
| 0.25             | 380        | 50     | 31794                                                     | 0.532 | 33780                                                     |
| 0.25             | 500        | 50     | 34244                                                     | 0.564 | 37196                                                     |
| 0.36             | 380        | 50     | 32751                                                     | 0.514 | 32664                                                     |
| 0.36             | 500        | 50     | 36234                                                     | 0.553 | 37301                                                     |
| 0.47             | 400        | 50     | 35246                                                     | 0.518 | 36118                                                     |
| 0.47             | 500        | 50     | 35349                                                     | 0.530 | 37921                                                     |
| 0.57             | 400        | 50     | 34916                                                     | 0.494 | 36012                                                     |
| 0.57             | 500        | 50     | 36593                                                     | 0.538 | 35854                                                     |
| 0.66             | 400        | 50     | 35453                                                     | 0.550 | 37388                                                     |
| 0.66             | 500        | 50     | 36248                                                     | 0.498 | 39318                                                     |
| 0.76             | 400        | 50     | 31621                                                     | 0.556 | 32015                                                     |
| 0.76             | 500        | 50     | 33180                                                     | 0.540 | 35093                                                     |



**Table S7:**  $k_p^{\text{cop}}$  values for BA/HEA PLP copolymerizations in 50 v% MIBK

| $f_{\text{HEA}}$ | $\nu$ (Hz) | T (°C) | $k_p^{\text{DR}}$ (L·mol <sup>-1</sup> ·s <sup>-1</sup> ) | L1/L2 | $k_p^{\text{LS}}$ (L·mol <sup>-1</sup> ·s <sup>-1</sup> ) |
|------------------|------------|--------|-----------------------------------------------------------|-------|-----------------------------------------------------------|
| 0                | 420        | 30     | 18195                                                     | 0.542 | 18805                                                     |
| 0.13             | 320        | 30     | 19623                                                     | 0.528 | 19194                                                     |
| 0.13             | 420        | 30     | 19802                                                     | 0.522 | 20327                                                     |
| 0.25             | 320        | 30     | 24913                                                     | 0.509 | 26128                                                     |
| 0.25             | 420        | 30     | 23947                                                     | 0.545 | 24157                                                     |
| 0.36             | 320        | 30     | 25547                                                     | 0.554 | 26283                                                     |
| 0.36             | 420        | 30     | 26398                                                     | 0.551 | 26184                                                     |
| 0.57             | 320        | 30     | 27844                                                     | 0.523 | 29850                                                     |
| 0.57             | 420        | 30     | 29005                                                     | 0.527 | 28826                                                     |
| 0.66             | 320        | 30     | 27845                                                     | 0.499 | 27577                                                     |
| 0.66             | 420        | 30     | 29637                                                     | 0.540 | 31513                                                     |
| 0                | 400        | 50     | 29833                                                     | 0.561 | 29989                                                     |
| 0                | 500        | 50     | 30493                                                     | 0.537 | 32525                                                     |
| 0.13             | 400        | 50     | 28589                                                     | 0.564 | 31097                                                     |
| 0.13             | 500        | 50     | 29292                                                     | 0.564 | 30149                                                     |
| 0.25             | 400        | 50     | 30123                                                     | 0.520 | 30799                                                     |
| 0.25             | 500        | 50     | 32476                                                     | 0.573 | 34135                                                     |
| 0.36             | 400        | 50     | 37757                                                     | 0.526 | 38059                                                     |
| 0.36             | 500        | 50     | 38554                                                     | 0.498 | 41707                                                     |
| 0.57             | 400        | 50     | 37816                                                     | 0.557 | 39040                                                     |
| 0.57             | 500        | 50     | 41593                                                     | 0.573 | 45252                                                     |

**Table S8:**  $k_p^{\text{cop}}$  values for BA/HEA PLP copolymerizations in 50 v% Xylenes

| $f_{\text{HEA}}$ | $\nu$ (Hz) | T (°C) | $k_p^{\text{DR}}$ (L·mol <sup>-1</sup> ·s <sup>-1</sup> ) | L1/L2 | $k_p^{\text{LS}}$ (L·mol <sup>-1</sup> ·s <sup>-1</sup> ) |
|------------------|------------|--------|-----------------------------------------------------------|-------|-----------------------------------------------------------|
| 0                | 320        | 30     | 17841                                                     | 0.515 | 18414                                                     |
| 0                | 420        | 30     | 19477                                                     | 0.499 | 20528                                                     |
| 0.13             | 330        | 30     | 22156                                                     | 0.569 | 23248                                                     |
| 0.13             | 430        | 30     | 23361                                                     | 0.499 | 22748                                                     |
| 0.25             | 400        | 30     | 28800                                                     | 0.504 | 29051                                                     |
| 0.25             | 500        | 30     | 27139                                                     | 0.547 | 28571                                                     |
| 0.25             | 500        | 30     | 29580                                                     | 0.523 | 28966                                                     |
| 0.36             | 340        | 30     | 31729                                                     | 0.536 | 31667                                                     |
| 0.36             | 440        | 30     | 33148                                                     | 0.503 | 35816                                                     |
| 0                | 400        | 50     | 28732                                                     | 0.511 | 27986                                                     |
| 0                | 500        | 50     | 30514                                                     | 0.571 | 29643                                                     |
| 0.13             | 400        | 50     | 33647                                                     | 0.529 | 35846                                                     |
| 0.13             | 500        | 50     | 35788                                                     | 0.506 | 37776                                                     |
| 0.25             | 400        | 50     | 41421                                                     | 0.523 | 43241                                                     |
| 0.25             | 500        | 50     | 42045                                                     | 0.569 | 45606                                                     |
| 0.37             | 400        | 50     | 46098                                                     | 0.500 | 48455                                                     |
| 0.37             | 500        | 50     | 49919                                                     | 0.571 | 53319                                                     |

**Table S9:**  $k_p^{\text{cop}}$  values for BA/MEA PLP copolymerizations in bulk; <sup>a</sup> samples polymerized with 7 mM/L photoinitiator

| $f_{\text{MEA}}$ | $\nu$ (Hz)       | T (°C) | $k_p^{\text{DR}}$ (L·mol <sup>-1</sup> ·s <sup>-1</sup> ) | L1/L2 | $k_p^{\text{LS}}$ (L·mol <sup>-1</sup> ·s <sup>-1</sup> ) |
|------------------|------------------|--------|-----------------------------------------------------------|-------|-----------------------------------------------------------|
| 0                | 400              | 30     | 18400                                                     | 0.514 | 19005                                                     |
| 0.11             | 380              | 30     | 18165                                                     | 0.535 | 19439                                                     |
| 0.11             | 480              | 30     | 18900                                                     | 0.534 | 19379                                                     |
| 0.32             | 380              | 30     | 19212                                                     | 0.564 | 20235                                                     |
| 0.32             | 480              | 30     | 20137                                                     | 0.562 | 20992                                                     |
| 0.53             | 380              | 30     | 20228                                                     | 0.503 | 20107                                                     |
| 0.53             | 480              | 30     | 20902                                                     | 0.497 | 21286                                                     |
| 0.72             | 380              | 30     | 21251                                                     | 0.495 | 21519                                                     |
| 0.72             | 480              | 30     | 22784                                                     | 0.560 | 22558                                                     |
| 0.91             | 380              | 30     | 23095                                                     | 0.536 | 24876                                                     |
| 0.91             | 480              | 30     | 24362                                                     | 0.534 | 24145                                                     |
| 1                | 380              | 30     | 22819                                                     | 0.563 | 22171                                                     |
| 1                | 480              | 30     | 24459                                                     | 0.516 | 26472                                                     |
| 1                | 380 <sup>a</sup> | 30     | 23525                                                     | 0.502 | 22885                                                     |
| 1                | 480 <sup>a</sup> | 30     | 24459                                                     | 0.570 | 23732                                                     |
| 0                | 450              | 50     | 26246                                                     | 0.522 | 27438                                                     |
| 0.11             | 400              | 50     | 23927                                                     | 0.549 | 24263                                                     |
| 0.11             | 500              | 50     | 26391                                                     | 0.567 | 28842                                                     |
| 0.32             | 400              | 50     | 25903                                                     | 0.562 | 26720                                                     |
| 0.32             | 500              | 50     | 27681                                                     | 0.567 | 28404                                                     |
| 0.53             | 400              | 50     | 29765                                                     | 0.518 | 32460                                                     |
| 0.53             | 500              | 50     | 30273                                                     | 0.568 | 31474                                                     |
| 0.72             | 400              | 50     | 32807                                                     | 0.567 | 33693                                                     |
| 0.72             | 500              | 50     | 32532                                                     | 0.502 | 32697                                                     |
| 0.91             | 400              | 50     | 35147                                                     | 0.512 | 37468                                                     |
| 0.91             | 500              | 50     | 35384                                                     | 0.527 | 36642                                                     |
| 1                | 400              | 50     | 38285                                                     | 0.548 | 40858                                                     |
| 1                | 500              | 50     | 37479                                                     | 0.509 | 39395                                                     |
| 1                | 400 <sup>a</sup> | 50     | 35822                                                     | 0.491 | 35285                                                     |
| 1                | 500 <sup>a</sup> | 50     | 35468                                                     | 0.555 | 36308                                                     |

**Table S10:**  $k_p^{cop}$  values for BA/MEA PLP copolymerizations in 50 v% BuOH

| $f_{MEA}$ | $\nu$ (Hz) | T (°C) | $k_p^{DR}$ (L·mol <sup>-1</sup> ·s <sup>-1</sup> ) | L1/L2 | $k_p^{LS}$ (L·mol <sup>-1</sup> ·s <sup>-1</sup> ) |
|-----------|------------|--------|----------------------------------------------------|-------|----------------------------------------------------|
| 0         | 300        | 30     | 22396                                              | 0.526 | 22841                                              |
| 0         | 400        | 30     | 22867                                              | 0.544 | 23047                                              |
| 0.11      | 380        | 30     | 22938                                              | 0.522 | 22791                                              |
| 0.11      | 480        | 30     | 24072                                              | 0.560 | 25114                                              |
| 0.32      | 380        | 30     | 25022                                              | 0.504 | 25697                                              |
| 0.32      | 480        | 30     | 26261                                              | 0.566 | 27683                                              |
| 0.53      | 380        | 30     | 27302                                              | 0.523 | 27451                                              |
| 0.53      | 480        | 30     | 28453                                              | 0.494 | 30445                                              |
| 0.72      | 380        | 30     | 29310                                              | 0.496 | 31342                                              |
| 0.72      | 480        | 30     | 30963                                              | 0.512 | 30795                                              |
| 0.91      | 380        | 30     | 31184                                              | 0.560 | 33705                                              |
| 0.91      | 480        | 30     | 32726                                              | 0.543 | 31896                                              |
| 1         | 380        | 30     | 31921                                              | 0.573 | 33846                                              |
| 1         | 480        | 30     | 33284                                              | 0.557 | 36195                                              |
| 0         | 420        | 50     | 33295                                              | 0.542 | 36306                                              |
| 0         | 500        | 50     | 35689                                              | 0.516 | 34943                                              |
| 0.11      | 450        | 50     | 34580                                              | 0.519 | 34811                                              |
| 0.11      | 500        | 50     | 35007                                              | 0.515 | 34325                                              |
| 0.32      | 450        | 50     | 36120                                              | 0.556 | 36128                                              |
| 0.32      | 500        | 50     | 37639                                              | 0.493 | 37914                                              |
| 0.53      | 450        | 50     | 39417                                              | 0.523 | 42446                                              |
| 0.53      | 500        | 50     | 39919                                              | 0.530 | 40779                                              |
| 0.72      | 450        | 50     | 41703                                              | 0.521 | 43222                                              |
| 0.72      | 500        | 50     | 44391                                              | 0.507 | 46893                                              |
| 0.91      | 450        | 50     | 44673                                              | 0.555 | 47634                                              |
| 0.91      | 500        | 50     | 45890                                              | 0.520 | 48339                                              |
| 1         | 450        | 50     | 44907                                              | 0.544 | 46390                                              |
| 1         | 500        | 50     | 47226                                              | 0.512 | 48872                                              |

**Table S11:**  $k_p^{\text{cop}}$  values for BMA/MEA PLP copolymerizations in bulk

| $f_{\text{MEA}}$ | $\nu$ (Hz) | T (°C) | $k_p^{\text{DR}}$ (L·mol <sup>-1</sup> ·s <sup>-1</sup> ) | L1/L2 | $k_p^{\text{LS}}$ (L·mol <sup>-1</sup> ·s <sup>-1</sup> ) |
|------------------|------------|--------|-----------------------------------------------------------|-------|-----------------------------------------------------------|
| 0.12             | 20         | 50     | 803                                                       | 0.539 | 833                                                       |
| 0.12             | 40         | 50     | 886                                                       | 0.548 | 875                                                       |
| 0.35             | 23         | 50     | 993                                                       | 0.525 | 1029                                                      |
| 0.35             | 43         | 50     | 1107                                                      | 0.543 | 1172                                                      |
| 0.55             | 26         | 50     | 1313                                                      | 0.492 | 1395                                                      |
| 0.55             | 46         | 50     | 1449                                                      | 0.480 | 1470                                                      |
| 0.74             | 75         | 50     | 2196                                                      | 0.507 | 2306                                                      |
| 0.74             | 120        | 50     | 2481                                                      | 0.540 | 2505                                                      |
| 0.92             | 150        | 50     | 5521                                                      | 0.546 | 5983                                                      |
| 0.92             | 300        | 50     | 6932                                                      | 0.537 | 7404                                                      |
| 0.12             | 50         | 80     | 1734                                                      | 0.515 | 1776                                                      |
| 0.12             | 100        | 80     | 1927                                                      | 0.535 | 2095                                                      |
| 0.35             | 55         | 80     | 2264                                                      | 0.492 | 2402                                                      |
| 0.35             | 105        | 80     | 2392                                                      | 0.549 | 2595                                                      |
| 0.55             | 60         | 80     | 2946                                                      | 0.501 | 3184                                                      |
| 0.55             | 110        | 80     | 3161                                                      | 0.498 | 3235                                                      |
| 0.74             | 300        | 80     | 6156                                                      | 0.527 | 6265                                                      |
| 0.74             | 400        | 80     | 5419                                                      | 0.539 | 5851                                                      |
| 0.92             | 400        | 80     | 14366                                                     | 0.520 | 15595                                                     |
| 0.92             | 500        | 80     | 14833                                                     | 0.538 | 16019                                                     |

**Table S12:**  $k_p^{\text{cop}}$  values for BMA/MEA PLP copolymerizations in 50 v% BuOH

| $f_{\text{MEA}}$ | $\nu$ (Hz) | T (°C) | $k_p^{\text{DR}}$ (L·mol <sup>-1</sup> ·s <sup>-1</sup> ) | L1/L2 | $k_p^{\text{LS}}$ (L·mol <sup>-1</sup> ·s <sup>-1</sup> ) |
|------------------|------------|--------|-----------------------------------------------------------|-------|-----------------------------------------------------------|
| 0.12             | 20         | 50     | 1048                                                      | 0.540 | 1032                                                      |
| 0.12             | 40         | 50     | 1139                                                      | 0.536 | 1111                                                      |
| 0.35             | 40         | 50     | 1434                                                      | 0.517 | 1501                                                      |
| 0.35             | 60         | 50     | 1338                                                      | 0.505 | 1426                                                      |
| 0.55             | 60         | 50     | 1859                                                      | 0.550 | 1970                                                      |
| 0.55             | 80         | 50     | 1865                                                      | 0.550 | 1864                                                      |
| 0.74             | 100        | 50     | 2721                                                      | 0.507 | 2860                                                      |
| 0.74             | 150        | 50     | 3243                                                      | 0.495 | 3341                                                      |
| 0.92             | 380        | 50     | 9227                                                      | 0.531 | 9619                                                      |
| 0.92             | 480        | 50     | 10702                                                     | 0.492 | 11091                                                     |
| 0.12             | 50         | 80     | 2332                                                      | 0.493 | 2372                                                      |
| 0.12             | 100        | 80     | 2249                                                      | 0.512 | 2255                                                      |
| 0.35             | 70         | 80     | 3016                                                      | 0.527 | 3082                                                      |
| 0.35             | 120        | 80     | 2872                                                      | 0.503 | 3000                                                      |
| 0.55             | 90         | 80     | 4118                                                      | 0.510 | 4254                                                      |
| 0.55             | 140        | 80     | 3847                                                      | 0.533 | 3864                                                      |
| 0.74             | 200        | 80     | 5727                                                      | 0.532 | 5697                                                      |
| 0.74             | 300        | 80     | 6823                                                      | 0.501 | 6838                                                      |
| 0.92             | 400        | 80     | 19850                                                     | 0.490 | 20626                                                     |
| 0.92             | 500        | 80     | 23262                                                     | 0.512 | 23688                                                     |

**Table S13:**  $k_p^{\text{cop}}$  values for BMA/MEA PLP copolymerizations in 50 v% DMF

| $f_{\text{MEA}}$ | $\nu$ (Hz) | T (°C) | $k_p^{\text{DR}}$ ( $\text{L}\cdot\text{mol}^{-1}\cdot\text{s}^{-1}$ ) | L1/L2 | $k_p^{\text{LS}}$ ( $\text{L}\cdot\text{mol}^{-1}\cdot\text{s}^{-1}$ ) |
|------------------|------------|--------|------------------------------------------------------------------------|-------|------------------------------------------------------------------------|
| 0.12             | 20         | 50     | 869                                                                    | 0.510 | 880                                                                    |
| 0.12             | 40         | 50     | 891                                                                    | 0.513 | 891                                                                    |
| 0.35             | 40         | 50     | 1159                                                                   | 0.547 | 1131                                                                   |
| 0.35             | 60         | 50     | 1120                                                                   | 0.509 | 1170                                                                   |
| 0.55             | 60         | 50     | 1440                                                                   | 0.501 | 1458                                                                   |
| 0.55             | 80         | 50     | 1523                                                                   | 0.506 | 1497                                                                   |
| 0.74             | 150        | 50     | 2188                                                                   | 0.521 | 2384                                                                   |
| 0.74             | 200        | 50     | 2556                                                                   | 0.496 | 2727                                                                   |
| 0.92             | 400        | 50     | 8380                                                                   | 0.518 | 8886                                                                   |
| 0.92             | 500        | 50     | 9562                                                                   | 0.548 | 10245                                                                  |
| 1                | 450        | 50     | 38638                                                                  | 0.554 | 38632                                                                  |
| 1                | 500        | 50     | 38133                                                                  | 0.538 | 38831                                                                  |
| 0.12             | 50         | 80     | 1899                                                                   | 0.506 | 1873                                                                   |
| 0.12             | 100        | 80     | 1879                                                                   | 0.496 | 2000                                                                   |
| 0.35             | 70         | 80     | 2464                                                                   | 0.534 | 2408                                                                   |
| 0.35             | 120        | 80     | 2404                                                                   | 0.540 | 2479                                                                   |
| 0.55             | 90         | 80     | 3051                                                                   | 0.507 | 3052                                                                   |
| 0.55             | 140        | 80     | 2985                                                                   | 0.515 | 3106                                                                   |
| 0.74             | 150        | 80     | 5764                                                                   | 0.546 | 5746                                                                   |
| 0.74             | 200        | 80     | 6277                                                                   | 0.507 | 6214                                                                   |
| 0.92             | 450        | 80     | 11664                                                                  | 0.492 | 12209                                                                  |
| 0.92             | 500        | 80     | 12143                                                                  | 0.554 | 12219                                                                  |
